# Supplementary material for: Trastuzumab in Female Breast Cancer Patients With Reduced Left Ventricular Ejection Fraction
Source: PubMed Central journal article supplement — J Am Heart Assoc. 2018 Jul 24;7(15):e008637. doi: 10.1161/JAHA.118.008637 (PMC6201446; doi:10.1161/jaha.118.008637), 2018-07-24

# **SUPPLEMENTAL MATERIAL**

**Table S1. Long-term causes of death.**

|                               | <b>Normal LVEF (n=82)</b> | <b>Low LVEF (n=11)</b> |               |
|-------------------------------|---------------------------|------------------------|---------------|
| <b>Causes of death</b>        |                           |                        | <b>p=0.16</b> |
| <b>Cardiac</b>                | 2.4% (n=2)                | 18.2% (n=2)            |               |
| <b>Non-cardiac cancer</b>     | 87.8% (n=72)              | 81.8% (n=9)            |               |
| <b>Non-cardiac non-cancer</b> | 6.1% (n=5)                | -                      |               |
| <b>Unknown</b>                | 3.7% (n=3)                | -                      |               |

**Figure S1. Kaplan-Meier 5-year survival plot from the time of breast cancer diagnosis for patients with normal and reduced left ventricular ejection fraction (LVEF) at baseline, adjusted for age and stage of breast cancer ( $p < 0.001$  for group comparison by log rank). The number of patients is reduced in the normal LVEF by the 10 patients, for which stage of disease information was not available**

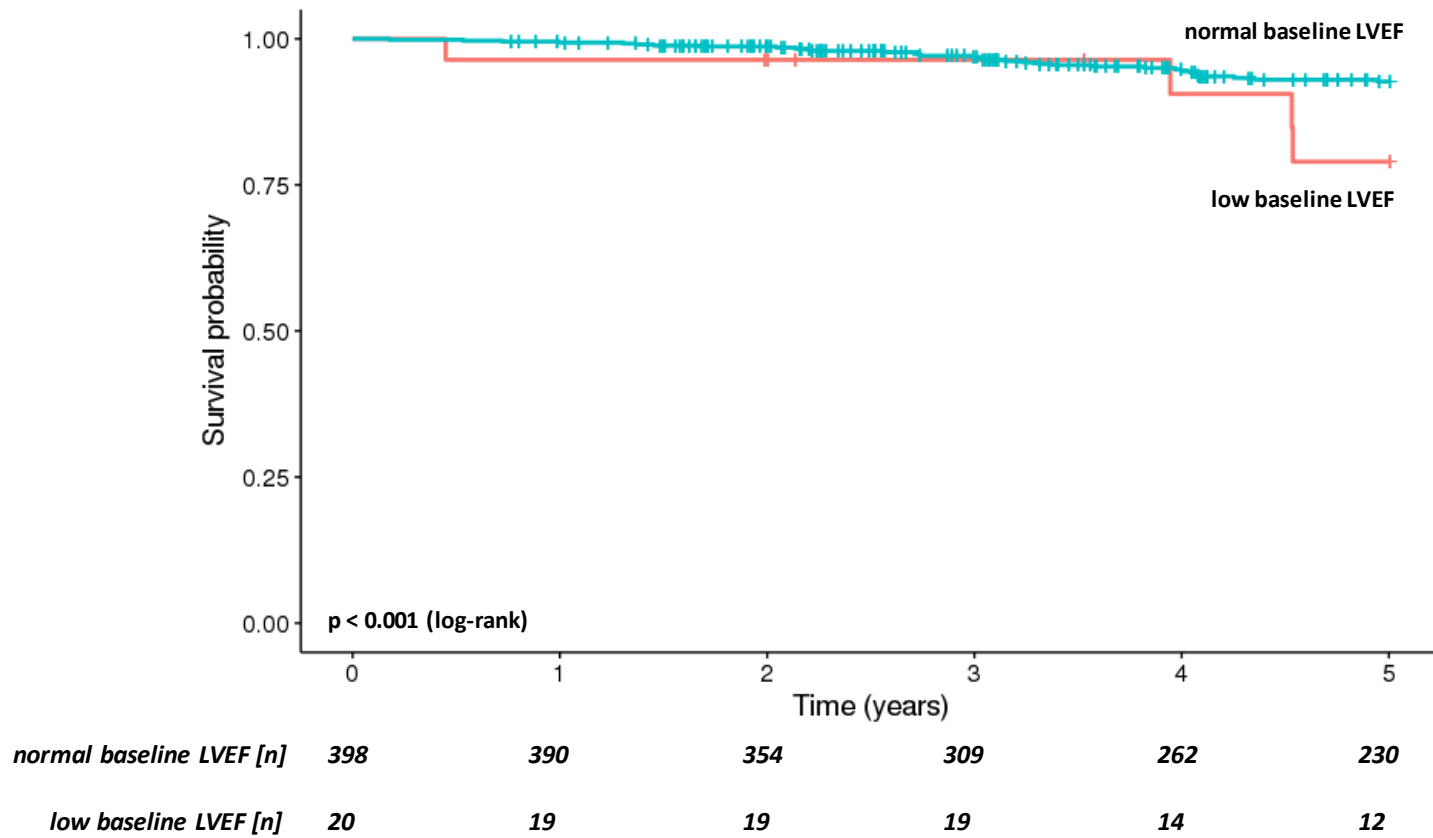

Supplement: JAH3-7-e008637-s001.pdf [file JAH3-7-e008637-s001.pdf]
